# Supplementary material for: A near-infrared fluorescent probe for detecting hydrogen sulfide with high selectivity in cells and ulcerative colitis in mice
Source: Royal Society of Chemistry journal article supplement (doi:10.1039/d3an01442h), 2023-01-01
Supplement: d3an01442h1.pdf [file d3an01442h1.pdf]

## Electronic Supplementary Information

### Near-infrared Fluorescent Probe for Detecting Hydrogen Sulfide with High Selectivity in Cells and Ulcerative Colitis Mice

Chong-Kang Qin,<sup>a</sup> Ling Yan,<sup>a</sup> Zhi-Qing Wang,<sup>a</sup> Guo Yu,<sup>a</sup> Guo-Jiang Mao,<sup>b</sup> Fen Xu,<sup>a</sup> Chun-Yan Li<sup>\*a</sup>

<sup>a</sup> Key Laboratory for Green Organic Synthesis and Application of Hunan Province, Key Laboratory of Environmentally Friendly Chemistry and Applications of Ministry of Education, College of Chemistry, Xiangtan University, Xiangtan, 411105, PR China.

<sup>b</sup> Henan Key Laboratory of Organic Functional Molecule and Drug Innovation, Collaborative Innovation Center of Henan Province for Green Manufacturing of Fine Chemicals, Key Laboratory of Green Chemical Media and Reactions, Ministry of Education, School of Chemistry and Chemical Engineering, Henan Normal University, Xinxiang, 453007, PR China.

\*Corresponding Author. E-mail: lichunyan79@sina.com.

## Table of contents

|                                                    |     |
|----------------------------------------------------|-----|
| 1. The comparison of H <sub>2</sub> S probes. .... | S3  |
| 2. Experimental Section .....                      | S5  |
| 3. Synthesis .....                                 | S9  |
| 4. Spectral data.....                              | S12 |
| 5. Response mechanism. ....                        | S13 |
| 6. Biological assays.....                          | S14 |

## 1. The comparison of H<sub>2</sub>S probes.

**Table S1 Comparison of some reported probes for the detection of H<sub>2</sub>S**

| Probe                                                                               | $\lambda_{\text{ex}}$<br>(nm) | $\lambda_{\text{em}}$<br>(nm) | Stokes<br>shift (nm) | Application                          | Response<br>time (s) | Reference |
|-------------------------------------------------------------------------------------|-------------------------------|-------------------------------|----------------------|--------------------------------------|----------------------|-----------|
| 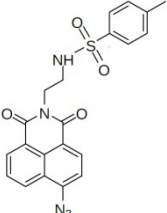   | 400                           | 548                           | 148                  | Cells imaging                        | 1800                 | Ref. 20   |
|    | 485                           | 522                           | 37                   | Cells imaging                        | 55                   | Ref. 23   |
|  | 380                           | 455                           | 75                   | Cells imaging                        | 300                  | Ref. 24   |
|  | 550                           | 586                           | 36                   | Paper chips and<br>zebrafish imaging | /                    | Ref. 25   |
|  | 575                           | 625                           | 50                   | cells imaging and<br>tissues imaging | /                    | Ref. 26   |
|  | 380                           | 598                           | 218                  | Cells imaging                        | 720                  | Ref. 27   |

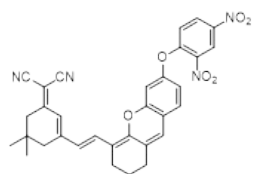

584

770

186

Cells imaging  
and imaging of  
ulcerative colitis  
mice

200

This work

---

## 2. Experimental Section

**Reagents and Instruments.** Cyclohexanone, phosphorus tribromide ( $\text{PBr}_3$ ), 2-hydroxy-4-methoxybenzaldehyde, cesium carbonate ( $\text{Cs}_2\text{CO}_3$ ), boron tribromide ( $\text{BBr}_3$ ), piperidine, isophorone, malononitrile were purchased from Aladdin (Shanghai, China). 2, 4-dinitrofluorobenzene, NaHS, 2-(aminoxy)acetic acid (AOAA) were bought from Macklin (Shanghai, China). Dextran sulfate sodium (DSS) were purchased from Aladdin (Shanghai, China). Unless otherwise stated, all chemicals were purchased from commercial suppliers and used without further purification.

Nuclear magnetic resonance (NMR) spectra were carried out on a Bruker Avance II NMR spectrometer (Germany). Mass spectra (MS) was acquired on a Bruker Autoflex MALDI-TOF mass spectrometer (Germany). Elemental analysis was obtained on PerkinElmer 2400 elemental analyzer (USA). The absorption spectra were collected on an Agilent CARY 60 UV-vis spectrophotometer (USA). The fluorescence spectra were determined by using a Hitachi F-4600 spectrophotometer (Japan). High-performance liquid chromatography (HPLC) experiments were conducted on LC-20A with a C18 column (Japan). The fluorescence images of cells were determined by using a Nikon confocal fluorescence microscope (Japan). The fluorescence images of mice were operated on an IVIS Lumina XR small animal optical in vivo imaging system (USA).

**Fluorescence Detection of  $\text{H}_2\text{S}$  in Solution.** First, IX- $\text{H}_2\text{S}$  stock solution (100  $\mu\text{M}$ ) and  $\text{H}_2\text{S}$  stock solution (1 mM) were arranged in DMF and water, respectively. The

measured solutions were prepared by diluting IX-H<sub>2</sub>S stock solution and H<sub>2</sub>S stock solution with PBS buffer solution (pH 7.4) in volumetric flask to obtain the corresponding concentration. The final concentration of probe was 10 μM and the H<sub>2</sub>S concentration was  $5.0 \times 10^{-5}$  to  $1.0 \times 10^{-6}$  M. The slit width was set to 10 nm/10 nm and fluorescence spectra in the range of 695.0-850.0 nm were recorded under the excitation at 584 nm at room temperature.

**Cell Culture and Cytotoxicity Assay.** The cells utilized were obtained from the State Key Laboratory of Chemistry/Biosensing and Chemometrics, Hunan University, and were grown in DMEM (Dulbecco's modified Eagle's medium) medium supplemented with 10% FBS (fetal bovine serum) in an atmosphere of 5% CO<sub>2</sub> at 37 °C. To evaluate cytotoxicity, MTT assay were performed after incubation with different concentrations of probe (0, 5, 10, 15, 20, 25, 30 μM).

**Fluorescence Imaging of H<sub>2</sub>S in Cells.** 293T cells (human embryonic kidney cell line) and HCT116 cells (human colorectal carcinoma cells) were exploited to image H<sub>2</sub>S in cells.

For imaging exogenous H<sub>2</sub>S, 293T cells were first directly subjected to confocal imaging as a cell blank to assess background fluorescence. Then, one group of cells were staining with IX-H<sub>2</sub>S for 15 min to obtain fluorescence images. Meantime, another two groups of cells were pretreated with NaHS (20 μM and 50 μM, individually) for 30 min and then treated with IX-H<sub>2</sub>S for 15 min.

For endogenous H<sub>2</sub>S imaging with IX-H<sub>2</sub>S, HCT116 cells were treated differently as follows. One group of cells were stained with IX-H<sub>2</sub>S for 15 min. Another two group of cells was pretreated with different concentrations of Cys (100 and 200 μM, individually) for 60 min, and then treated with IX-H<sub>2</sub>S. In addition, the last group of cells were sequentially treated with AOAA (200 μM) and Cys (200 μM) for 60 min, and then incubated with IX-H<sub>2</sub>S.

**Fluorescence Imaging of of H<sub>2</sub>S in Mice.** All animal manipulations were performed in accordance with the regulations issued by the Ethics Committee of Hunan Slack Jingda Experimental Animal Co., Ltd. (Changsha, China). BALB/c nude mice and C57BL/6 mice were used and maintained in good condition for all experiments.

To perform imaging of exogenous H<sub>2</sub>S, the BALB/c nude mice was subcutaneously injected with IX-H<sub>2</sub>S (200 μM) at the dark blue dotted circle in the left hind leg, followed by PBS buffer (pH 7.4, 100 μL) injection in the same area for imaging. Similarly, IX-H<sub>2</sub>S (200 μM) was injected subcutaneously in the right hind leg with the red dotted circle, and fluorescence images were obtained at distinct time points (0, 5, 10, 15 and 20 min) after injection of NaSH (1 mM, 100 μL) at the same location.

To image endogenous H<sub>2</sub>S in vivo, C57BL/6 mice were divided into two groups. One group of mice were drank deionized water as a control group. Another group of mice were drank 5% dextran sodium sulfate (DSS) solution for one week to establish the mice model of ulcerative colitis (UC). Two groups of mice were subjected to intraperitoneal injection

of the IX-H<sub>2</sub>S, and the images were acquired at 0, 5, 10, 15, 20, 25 and 30 min, respectively.



### 3. Synthesis

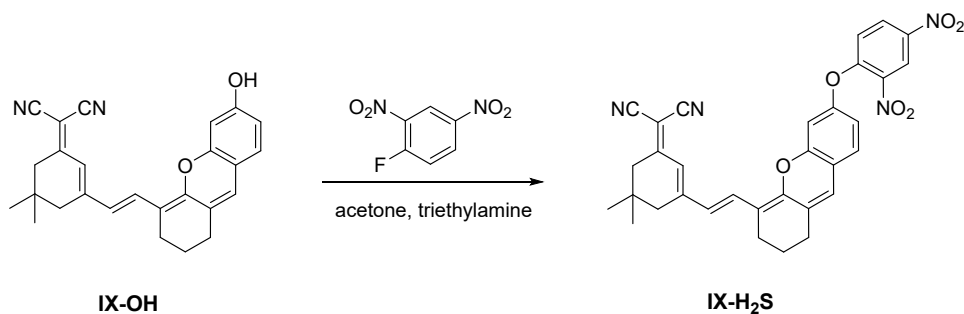

#### Scheme S1. Synthesis of probe IX-H<sub>2</sub>S.

IX-OH was synthesized according to previous work (Analyst. 2021, 146, 118-123). The fluorescence quantum yield of IX-OH is 0.27. IX-H<sub>2</sub>S was synthesized through a route described in Scheme S1. Compound IX-OH (0.10 g, 0.25 mmol) and 2,4-dinitrofluorobenzene (0.05 g, 0.25 mmol) was dissolved in acetone (5 mL), and triethylamine (0.5 mL) was pipetted into the reaction flask subsequently. Then the mixed solution was refluxed at 65°C for 0.5 h. Acetone was removed by evaporation, followed by the addition of 10 mL of 5% HCl solution. The precipitate was filtered and washed several times with water. The crude product was purified by recrystallization in acetone to yield a dark green solid. Yield: 0.11 g (80%). <sup>1</sup>H NMR (400 MHz, CDCl<sub>3</sub>) δ 8.86 (s, 1H), 8.36 (d, *J* = 8.0 Hz, 1H), 7.56-7.45 (m, 2H), 7.12 (d, *J* = 8.0 Hz, 2H), 6.86 (s, 1H), 6.74 (d, *J* = 8.0 Hz, 1H), 6.40 (t, *J* = 8.0 Hz, 2H), 2.55 (d, *J* = 4.0 Hz, 4H), 2.47 (s, 2H), 2.42 (s, 2H), 1.88-1.80 (m, 2H), 1.04 (s, 6H). <sup>13</sup>C NMR (100 MHz, CDCl<sub>3</sub>) δ 168.8, 155.5, 154.9, 154.2, 153.8, 150.0, 141.9, 139.7, 131.3, 130.2, 128.8, 127.5, 127.0, 122.5, 121.6, 119.8, 118.8, 114.9, 113.2, 107.7, 100.0, 76.2, 43.0, 39.2, 32.0, 29.9, 28.0, 24.7, 20.7. MS (TOF):

562.1. Elem. anal. (%) calcd. for  $C_{32}H_{26}N_4O_6$ : C, 68.32, H, 4.66, N, 9.96. Found: C, 68.28, H, 4.52, N, 10.02.

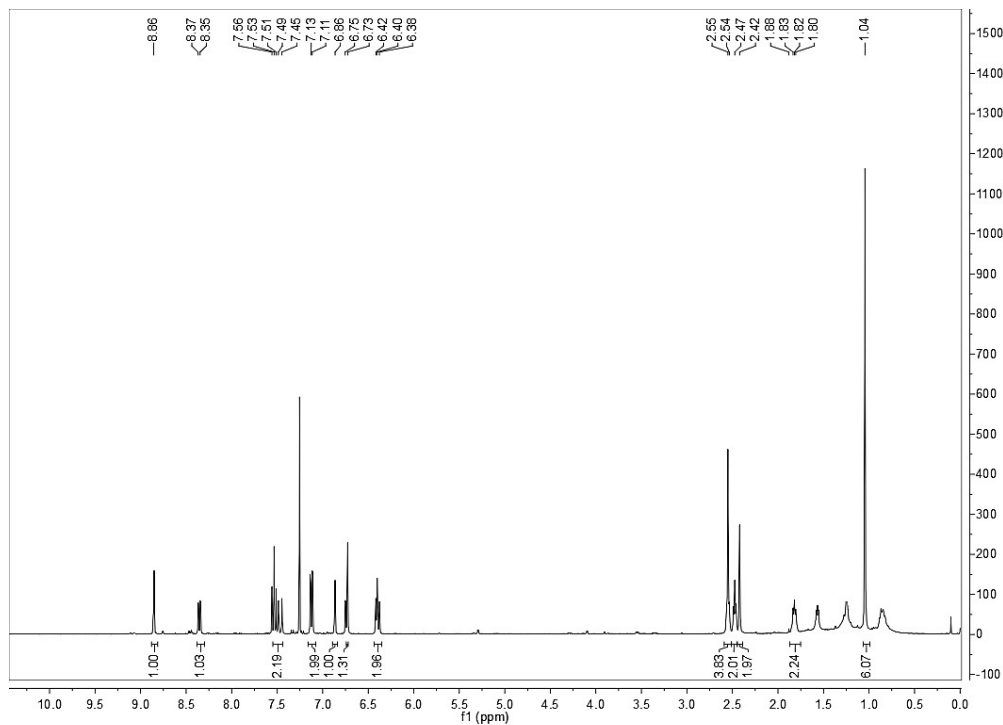

**Fig. S1.**  $^1\text{H}$  NMR spectra of IX- $\text{H}_2\text{S}$  in  $\text{CDCl}_3$ .

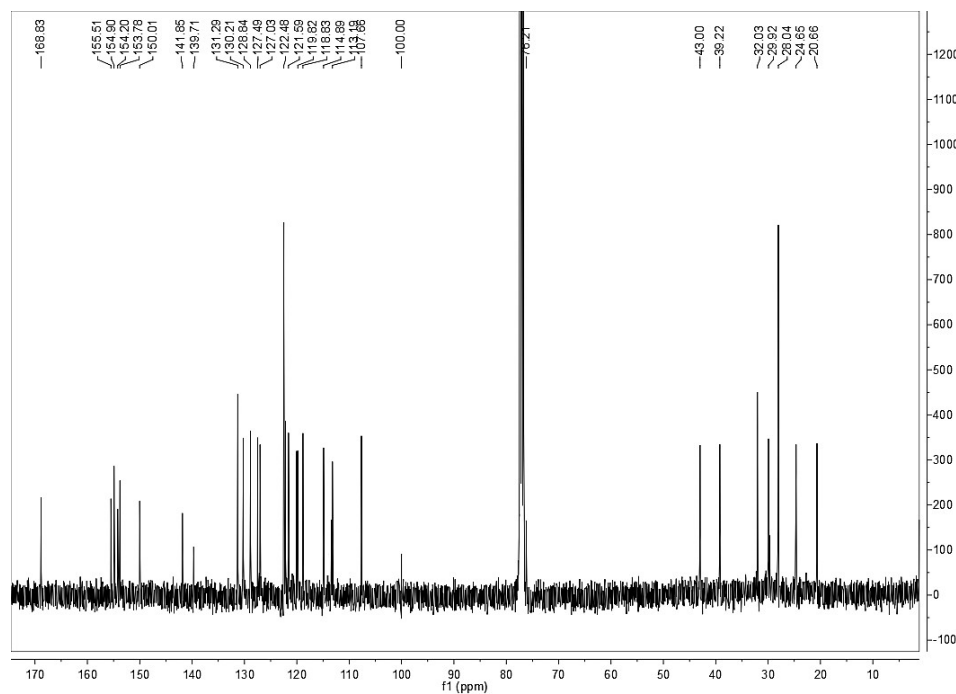

**Fig. S2.**  $^{13}\text{C}$  NMR spectra of IX- $\text{H}_2\text{S}$  in  $\text{CDCl}_3$ .

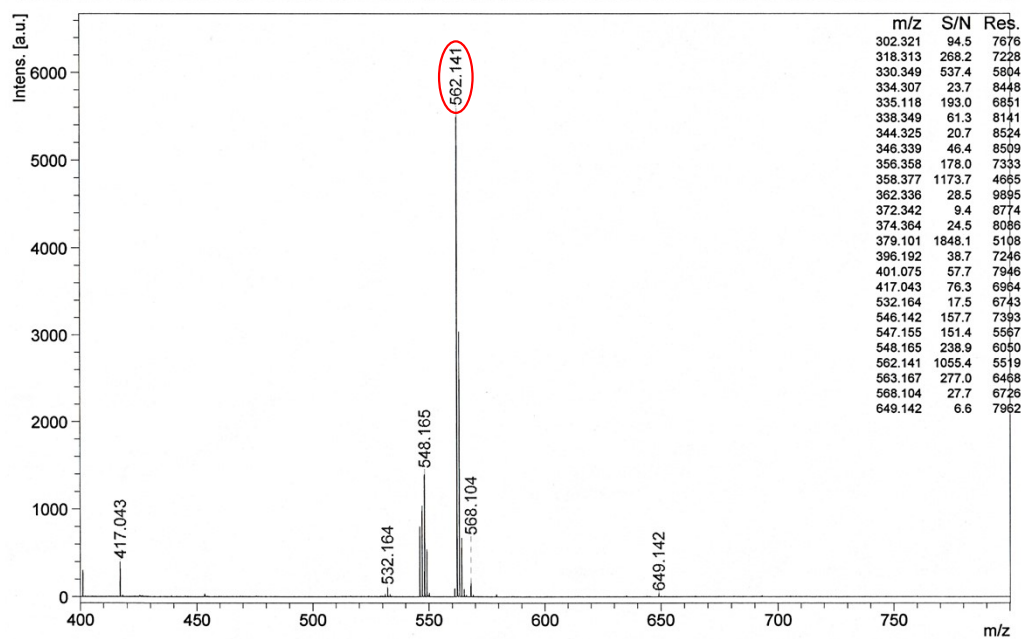

**Fig. S3.** Mass spectra of IX- $\text{H}_2\text{S}$ . MS (TOF) for  $\text{C}_{32}\text{H}_{26}\text{N}_4\text{O}_6$ : m/z Found, 562.1 (Calcd, 562.1).

#### 4. Spectral data.

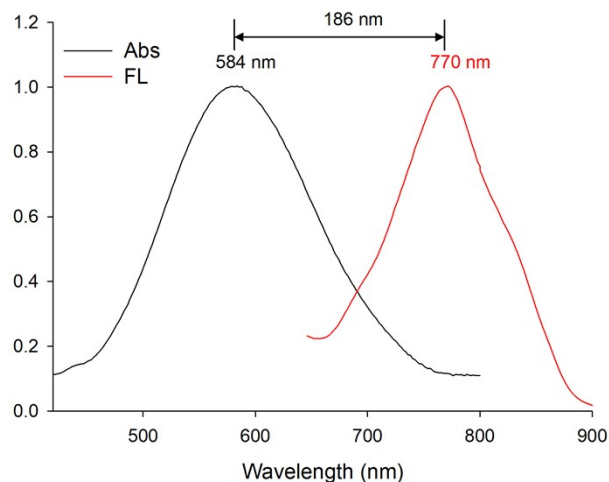

**Fig. S4.** The normalized absorption (black line) and fluorescence (red line) spectra of IX-OH at pH 7.4.

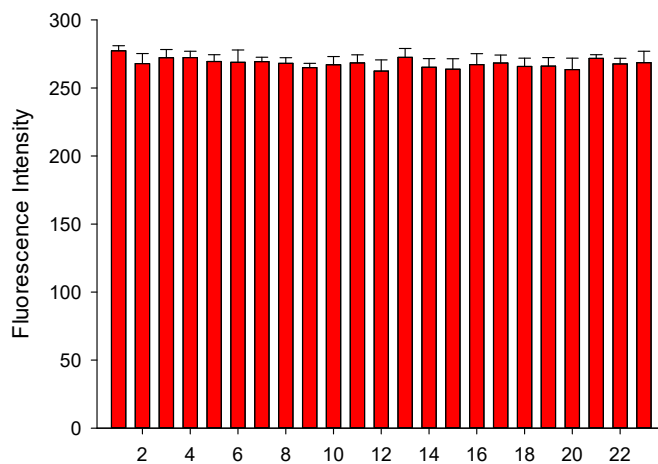

**Fig. S5.** Fluorescence intensity of IX-H<sub>2</sub>S (10 μM) with various analytes in the presence of H<sub>2</sub>S (50 μM): 1. Blank; 2. Cys; 3. Hcy; 4. GSH; 5. S<sub>2</sub>O<sub>3</sub><sup>2-</sup>; 6. SO<sub>4</sub><sup>2-</sup>; 7. CO<sub>3</sub><sup>2-</sup>; 8. HCO<sub>3</sub><sup>-</sup>; 9. ClO<sup>-</sup>; 10. NO<sub>3</sub><sup>-</sup>; 11. NO<sub>2</sub><sup>-</sup>; 12. ONOO<sup>-</sup>; 13. Cl<sup>-</sup>; 14. Br<sup>-</sup>; 15. I<sup>-</sup>; 16. NH<sub>4</sub><sup>+</sup>; 17. K<sup>+</sup>; 18. Na<sup>+</sup>; 19. Mg<sup>2+</sup>; 20. Ca<sup>2+</sup>; 21. Zn<sup>2+</sup>; 22. Fe<sup>2+</sup>; 23. Cu<sup>2+</sup>. Cys, Hcy and GSH are 5 mM and other analytes are 200 μM.

## 5. Response mechanism.

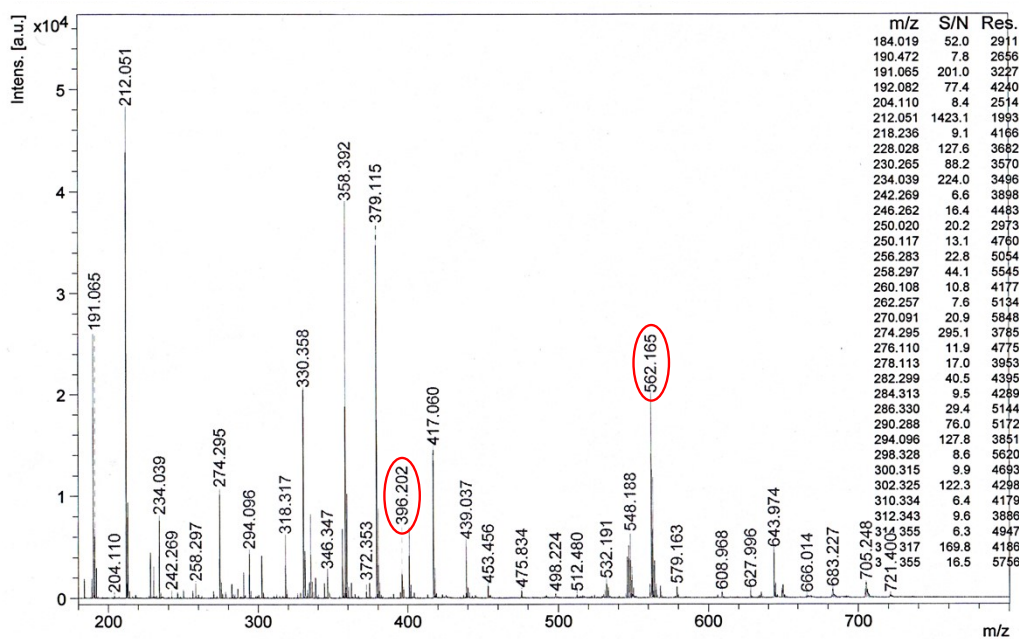

**Fig. S6.** Mass spectra of IX-H<sub>2</sub>S with H<sub>2</sub>S. MS (TOF) for C<sub>26</sub>H<sub>24</sub>N<sub>2</sub>O<sub>2</sub>: m/z Found, 396.2 (Calcd, 396.2).

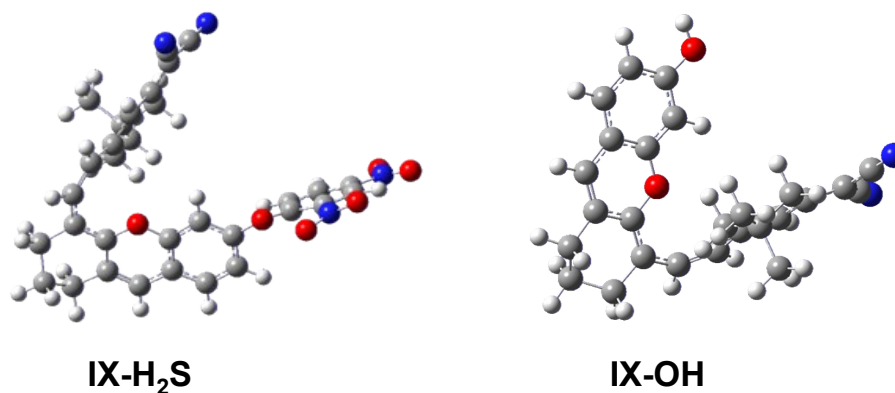

**Fig. S7.** The optimized structures of IX-H<sub>2</sub>S and IX-OH. In the ball-and-stick model, carbon, oxygen and nitrogen atoms are colored in gray, red and blue, respectively.

## 6. Biological assays.

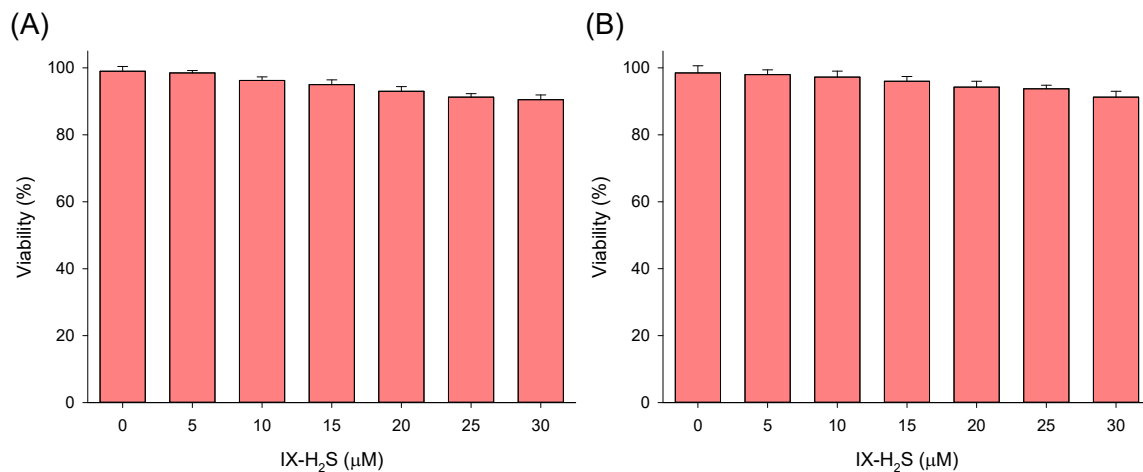

**Fig. S8.** MTT assay for estimating cell viability (%) of (A) 293T cells and (B) HCT116 cells treated with various concentrations of IX-H<sub>2</sub>S (0-30 μM) after 24 h incubation.

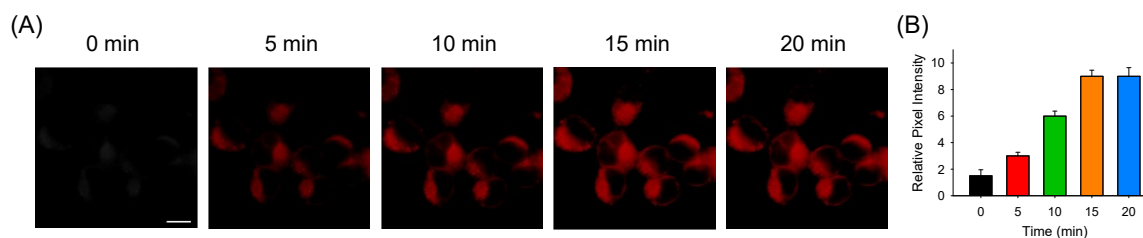

**Fig. S9.** (A) Fluorescence imaging of exogenous H<sub>2</sub>S in 293T cells. The cells were pretreated with NaHS (50 μM) for 30 min, and then incubated with IX-H<sub>2</sub>S (10 μM) at different time points: 0, 5, 10, 15, 20 min. (B) Relative pixel intensity in (A).  $\lambda_{\text{ex}} = 568 \text{ nm}$ ,  $\lambda_{\text{em}} = 750\text{-}850 \text{ nm}$ ; Scale bar: 10 μm.

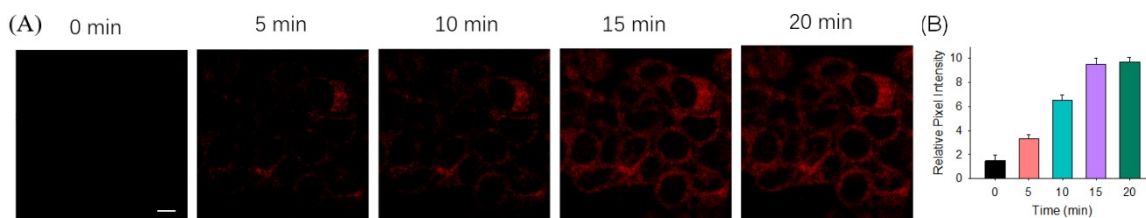

**Fig. S10.** (A) Fluorescence imaging of endogenous H<sub>2</sub>S in HCT116 cells. The cells were stimulated with Cys (200 μM) for 60 min and then incubated with IX-H<sub>2</sub>S (10 μM) at different time points: 0, 5, 10, 15, 20 min. (B) Relative pixel intensity in (A).  $\lambda_{\text{ex}} = 568 \text{ nm}$ ,  $\lambda_{\text{em}} = 750\text{-}850 \text{ nm}$ ; Scale bar: 10 μm.
